# Supplementary material for: Theoretical study of electronically excited radical cations of naphthalene and anthracene as archetypal models for astrophysical observations. Part I. Static aspects
Source: Royal Society of Chemistry journal article supplement (doi:10.1039/c1cp21083a), 2011-01-01
Supplement: c1cp21083a.pdf [file c1cp21083a.pdf]

**Supporting Information**

Theoretical study of electronically excited radical cations of naphthalene and anthracene as archetypical models for astrophysical observations. I. Static aspects

S. Ghanta, V. Sivaranjana Reddy and S. Mahapatra

E-mail: smsc@uohyd.ernet.in, Fax: +91-40-23011357;23012460

School of Chemistry, University of Hyderabad, Hyderabad 500 046, India

**This PDF file includes**

**Table S1, Table S2 and FIG. S1**

TABLE S1: *Ab initio* calculated equilibrium geometry parameters of the electronic ground state of neutral naphthalene along with the experimental data. The atom numbering in the table is illustrated in the schematic drawing below the table.

| Np (MP2/cc-pVDZ)                                  | our data | Expt data <sup>a</sup> |
|---------------------------------------------------|----------|------------------------|
| Bond length (Å)                                   |          |                        |
| C <sub>1</sub> - C <sub>2</sub>                   | 1.4415   | 1.412                  |
| C <sub>2</sub> - C <sub>3</sub>                   | 1.4270   | –                      |
| C <sub>3</sub> - C <sub>4</sub>                   | 1.3892   | –                      |
| C <sub>4</sub> - C <sub>5</sub>                   | 1.4231   | 1.417                  |
| C <sub>5</sub> - C <sub>6</sub>                   | 1.3892   | –                      |
| C <sub>3</sub> - H <sub>11</sub>                  | 1.0965   | 1.092                  |
| C <sub>4</sub> - H <sub>12</sub>                  | 1.0953   | 1.092                  |
| Bond Angle (deg)                                  |          |                        |
| C <sub>1</sub> - C <sub>2</sub> - C <sub>3</sub>  | 118.981  | –                      |
| C <sub>2</sub> - C <sub>3</sub> - C <sub>4</sub>  | 120.7356 | –                      |
| C <sub>3</sub> - C <sub>4</sub> - C <sub>5</sub>  | 120.2834 | –                      |
| C <sub>6</sub> - C <sub>1</sub> - C <sub>7</sub>  | 122.0380 | –                      |
| C <sub>2</sub> - C <sub>3</sub> - H <sub>11</sub> | 118.8773 | –                      |
| C <sub>3</sub> - C <sub>4</sub> - H <sub>12</sub> | 120.3871 | –                      |
| C <sub>3</sub> - C <sub>4</sub> - H <sub>12</sub> | 119.9362 | –                      |
| C <sub>4</sub> - C <sub>5</sub> - H <sub>12</sub> | 119.7804 | –                      |

<sup>a</sup> N. Ketkar *et al.*, *J. Mol. Struct.* 1981, **77**, 139.

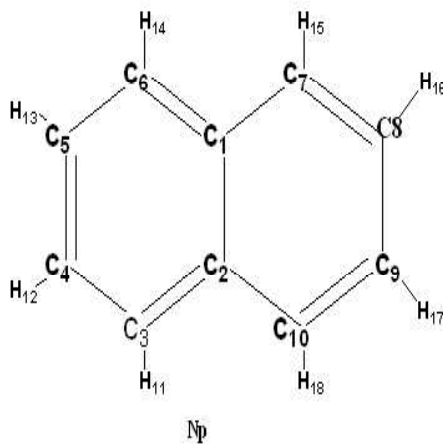

TABLE S2: Same as in Table S1 for the electronic ground state of neutral anthracene.

| An (MP2/cc-pVDZ)                                  | our data | Expt data <sup>b</sup> |
|---------------------------------------------------|----------|------------------------|
| Bond length (Å)                                   |          |                        |
| C <sub>1</sub> - C <sub>2</sub>                   | 1.3844   | 1.397                  |
| C <sub>1</sub> - C <sub>6</sub>                   | 1.4299   | 1.422                  |
| C <sub>2</sub> - C <sub>3</sub>                   | 1.4337   | 1.437                  |
| C <sub>3</sub> - C <sub>4</sub>                   | 1.4511   | 1.437                  |
| C <sub>3</sub> - C <sub>7</sub>                   | 1.4103   | 1.392                  |
| C <sub>1</sub> - H <sub>17</sub>                  | 1.0954   | –                      |
| C <sub>2</sub> - H <sub>18</sub>                  | 1.0966   | –                      |
| C <sub>7</sub> - H <sub>16</sub>                  | 1.0979   | –                      |
| Bond Angle (deg)                                  |          |                        |
| C <sub>1</sub> - C <sub>2</sub> - C <sub>3</sub>  | 120.815  | –                      |
| C <sub>2</sub> - C <sub>3</sub> - C <sub>4</sub>  | 118.775  | –                      |
| C <sub>2</sub> - C <sub>3</sub> - C <sub>7</sub>  | 121.990  | 122.3                  |
| C <sub>2</sub> - C <sub>1</sub> - C <sub>6</sub>  | 120.416  | 120.4                  |
| C <sub>5</sub> - C <sub>6</sub> - C <sub>1</sub>  | 120.410  | –                      |
| C <sub>3</sub> - C <sub>7</sub> - C <sub>10</sub> | 121.529  | 121.0                  |
| C <sub>7</sub> - C <sub>10</sub> - C <sub>9</sub> | 119.236  | –                      |
| C <sub>7</sub> - C <sub>3</sub> - C <sub>4</sub>  | 119.236  | 118.4                  |
| H <sub>17</sub> - C <sub>1</sub> - C <sub>2</sub> | 119.938  | –                      |
| H <sub>17</sub> - C <sub>1</sub> - C <sub>6</sub> | 119.652  | –                      |
| H <sub>18</sub> - C <sub>2</sub> - C <sub>3</sub> | 118.697  | –                      |
| H <sub>18</sub> - C <sub>2</sub> - C <sub>1</sub> | 120.488  | –                      |
| H <sub>16</sub> - C <sub>7</sub> - C <sub>3</sub> | 119.236  | –                      |

<sup>b</sup> N. Ketkar *et al.*, *J. Mol. Struct.* 1981, **77**, 127.

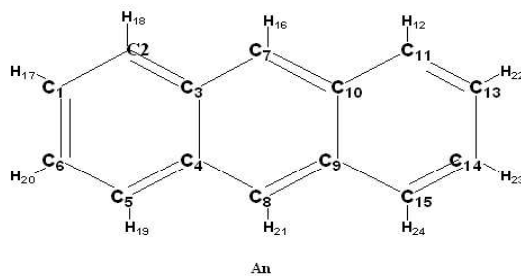

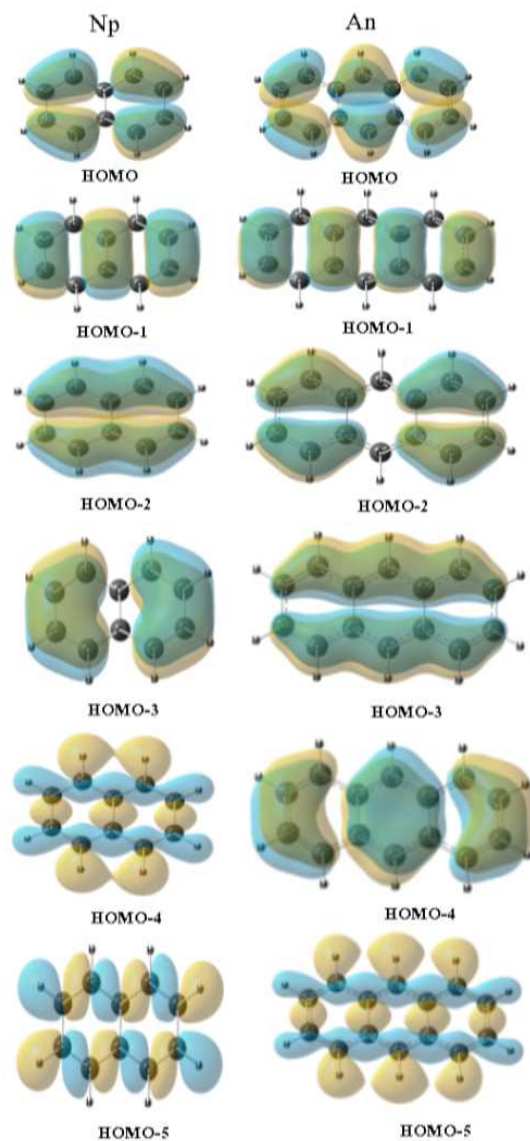

FIG. S1: The first six highest occupied molecular orbitals of the electronic ground state of neutral naphthalene and anthracene.
